# Supplementary material for: Information sources for obesity prevention policy research: a review of systematic reviews
Source: Springer Nature journal article supplement (doi:10.1186/s13643-017-0543-2), 2017-08-08
Supplement: MOESM1 [file 13445940]

## **Additional file 1. Search strategy to identify systematic reviews in obesity prevention policy**

### **PubMed:**

(policy[ti] OR policies[ti] OR legislat\*[ti] OR tax\*[ti] OR subsid\*[ti] OR "health policy"[majr]) AND (food[ti] OR obesity[ti] OR obese[ti] OR overweight[ti] OR "physical activity"[ti] OR "physical education"[ti] OR exercise[ti] OR nutrition[ti] OR diet[ti] OR dietary[ti] OR "sugar-sweetened beverages"[ti] OR "sugar-sweetened beverage"[ti] OR "competitive food"[ti] OR "competitive beverages"[ti]) AND (systematic[ti] OR meta[ti] OR systematic[sb])

### **PAIS and Worldwide Political Science Abstracts:**

(ti(policy OR policies OR legislation\* OR law\* OR tax\* OR subsid\*) OR su("health policy")) AND ((obes\* OR overweight OR "physical activity" OR "physical education" OR exercise OR nutrition OR diet\* OR "sugar-sweetened beverages" OR "sugar-sweetened beverage" OR "competitive food" OR "competitive beverage" OR "competitive beverages" OR food) AND ti(systematic OR meta\* OR review))

### **Scopus:**

(( TITLE (( policy OR policies OR legislation\* OR law\* OR tax\* OR subsid\* )) OR TITLE-ABS-KEY ( health policy )) AND TITLE-ABS-KEY ((obesity OR obese OR overweight OR physical activity OR physical education OR exercise OR nutrition OR diet OR dietary OR sugarsweetened beverages OR sugar-sweetened beverage OR competitive food OR competitive beverage OR competitive beverages OR food ))) AND ( systematic OR meta\* OR review )

### **Web of Science:**

((TI=( policy OR policies OR legislation\* OR law\* OR tax\* OR subsid\* ) OR TS=("health policy")) AND TS=(obes\* OR overweight OR "physical activity" OR "physical education" OR exercise OR nutrition OR diet\* OR "sugar-sweetened beverages" OR "sugar-sweetened beverage" OR "competitive food" OR "competitive beverage" OR "competitive beverages" OR food) AND ti=(systematic OR meta\* OR "rapid review" OR scoping OR umbrella) )
